# Supplementary material
Source: publisher figshare collection journal article supplement (https://gsapubs.figshare.com/ndownloader/files/24711644)
Supplement: Supplementary file 1 [file 24711644]

## Sheet: Apatite Length Data
Length (µm)	Angle to c-axis	Sample No.	11 CAT 04			Length (µm)	Angle to c-axis	Sample No.	11 CAT 05			Length (µm)	Angle to c-axis	Sample No.	11 CAT 06			Length (µm)	Angle to c-axis	Sample No.	11 CAT 07			Length (µm)	Angle to c-axis	Sample No.	11 CAT 13			Length (µm)	Angle to c-axis	Sample No.	11 CAT 15			Length (µm)	Angle to c-axis	Sample No.	11 CAT 16			Length (µm)	Angle to c-axis	Sample No.	11 CAT 17
14.53	66	Mean	14.3212	±	0.285662	5.99	57	Mean	13.5188	±	0.211449	12.19	85	Mean	14.311	±	0.253484	14.36	65	Mean	14.3462	±	0.432704	14.98	85	Mean	13.6511	±	0.512361	13.72	40	Mean	13.9888	±	0.103951	14.01	88	Mean	14.7484	±	0.143661	16.14	75	Mean	14.8405	±	0.180086
14.17	73	SD	1.36999			13.65	53	SD	1.74365			12.7	78	SD	1.13361			15.36	57	SD	1.14483			13.68	63	SD	2.61254			13.88	80	SD	1.04985			12.89	44	SD	1.19334			13.94	34	SD	1.418
15.56	44	Skew	-2.24964			14.11	54	Skew	-1.33504			12.45	85	Skew	-1.03149			15.9	82	Skew	-0.912767			14.38	44	Skew	-1.96639			12.59	48	Skew	-0.538299			14.42	35	Skew	-0.266968			15.88	28	Skew	-1.80816
13.04	30	n	24			13.99	32	n	69			15.43	78	n	21			12.06	83	n	8			15.29	47	n	27			14.55	30	n	103			12.62	39	n	70			15.39	28	n	63
14.42	73					13.27	38					15.27	37					13.97	85					14.15	84					14.82	6					14.42	33					15.45	75
13.51	79					12.37	45					11.96	75					13.94	62					14.02	89					14.47	82					15.86	77					14.5	87
15.9	47					15	49					14.54	44					14.79	59					15.06	59					14.93	77					15.77	73					16.23	8
16.05	84					11.56	66					14.98	80					14.39	48					7.18	55					11.25	44					14.69	72					14.43	72
9.21	85					12.62	58					15.44	74											14.17	52					15.42	63					15.93	55					14.05	89
13.91	69					14.45	39					14.99	86											13.88	66					12.41	72					14.02	79					15.79	59
15.21	28					8.89	69					15.48	70											9.77	76					14.01	76					16.33	55					13.25	49
15.59	16					13.08	68					15.33	47											15.16	74					14.45	28					15.59	55					13.63	43
14.64	79					12.8	59					14.59	85											15.59	27					13.22	49					14.6	29					10.5	71
14.85	68					12.71	72					14.42	73											14.07	48					14.79	84					11.46	72					8.58	35
14.17	57					15.94	59					15.24	54											12.81	66					12.89	44					15.22	32					14.55	79
14.99	45					12.24	49					14.42	89											16.92	89					14.58	31					15.95	24					12.95	87
14.01	89					11.98	68					14.61	89											14.91	35					13.98	25					14.97	49					15.74	66
14.53	38					11.21	67					13.06	57											13.36	47					14.63	71					15.38	32					13.51	48
14.31	80					11.41	67					14.27	73											14.63	69					13.87	69					14.81	48					14.52	53
14.72	67					13.34	40					14.44	65											13.39	65					13.23	71					14.83	39					14.09	70
13.22	57					12.69	28					14.72	61											9.75	82					13.7	82					12.8	86					13.85	64
15.64	55					13.8	38																	5.55	84					14.07	37					14.48	64					14.42	68
14.19	53					13.54	41																	15.15	74					12.37	87					13.16	54					15.4	38
13.34	60					16.53	55																	15.15	42					13.13	54					14.96	42					14.73	88
						14.87	66																	15.17	78					14.36	79					15.06	51					13.37	19
						13.83	87																	15.02	67					12.76	85					16.05	80					15	36
						14.4	75																	15.39	67					14.48	68					15.66	78					16.4	55
						16.07	73																							15.19	63					13.53	70					12.99	46
						15.03	54																							14.92	72					13.82	79					13.93	33
						13.28	72																							14.05	27					15.55	71					14.71	20
						14.45	77																							15.55	44					15.97	75					14.47	67
						13.09	87																							15.13	86					15.09	1					15.5	64
						10.73	79																							13.4	38					15.65	58					16.31	20
						10.95	87																							12.72	89					14.7	45					16.46	2
						13.66	65																							13.66	48					12.89	87					15.89	48
						13.08	38																							13.25	63					16.59	62					13.48	74
						12.82	54																							14.46	82					14.45	87					15.45	60
						14.94	31																							13.58	85					15.33	87					16.42	66
						14.1	55																							14.69	56					13.13	88					15.43	29
						15.69	57																							12.77	78					14.56	61					13.79	75
						14.27	73																							14.31	72					14.82	64					16.07	28
						14.36	52																							13.69	34					16.85	76					16.8	21
						11.97	55																							14.31	85					14.13	48					15.01	37
						15.05	49																							13.43	78					16.58	39					15.03	73
						12.97	38																							12.79	63					14.38	66					15.98	52
						10.69	48																							14.93	88					15.23	80					13.61	74
						12.29	87																							15.36	51					17.48	8					14.79	69
						12.34	84																							13.81	89					15.22	90					15.23	71
						14.13	72																							15.82	65					16.63	62					15.63	50
						12.95	58																							14.34	73					15.72	73					14.99	89
						13.84	20																							13.94	42					14.9	48					16.51	66
						15.38	87																							15.46	57					13.26	70					13.69	67
						14.63	64																							15.33	40					14.97	32					15.59	60
						13.68	62																							15.06	69					15.16	73					15.62	72
						13.77	49																							15.16	73					16.67	37					15.65	54
						14.52	66																							16.07	41					15.56	61					15.92	47
						13.19	45																							11.77	41					14.5	43					14.34	27
						14.33	50																							14.81	87					13.01	73					14.91	44
						15.75	42																							14.2	20					15.88	72					13.79	85
						12.61	80																							14.62	87					14.2	85					16.39	47
						16.61	33																							10.88	54					13.13	58					16.11	83
						14.29	67																							13.38	63					12.54	66					16.35	48
						13.51	73																							15.26	69					14.58	44					15.82	81
						13.16	63																							12.99	67					14.99	79
						14.08	72																							13.44	30					14.2	89
						16.32	36																							13.73	53					13.91	70
						14.21	82																							12.68	82					15.42	43
						14.43	54																							14.36	54					13.94	56
						15.31	33																							14.77	77					13.15	45
																														13.83	54					14.18	75
																														15.31	30
																														14.86	79
																														12.78	65
																														13.9	78
																														14.71	58
																														12.55	81
																														13.98	22
																														13.98	59
																														13.65	55
																														14.12	64
																														14.54	44
																														13.26	46
																														14.61	37
																														13.47	82
																														13.47	89
																														13.61	65
																														14.21	55
																														14.16	69
																														14.98	74
																														13.39	55
																														15.28	56
																														13.48	87
																														14.32	45
																														14.06	67
																														16.45	51
																														11.21	40
																														13.25	57
																														14.13	39
																														14.69	29
																														11.51	52
																														13.16	76
																														15.18	71
																														14.13	63
